# Supplementary material
Source: PubMed Central journal article supplement (PMC2971607)
Supplement: pp.110.163907_1.pdf [file pp.110.163907_1.pdf]

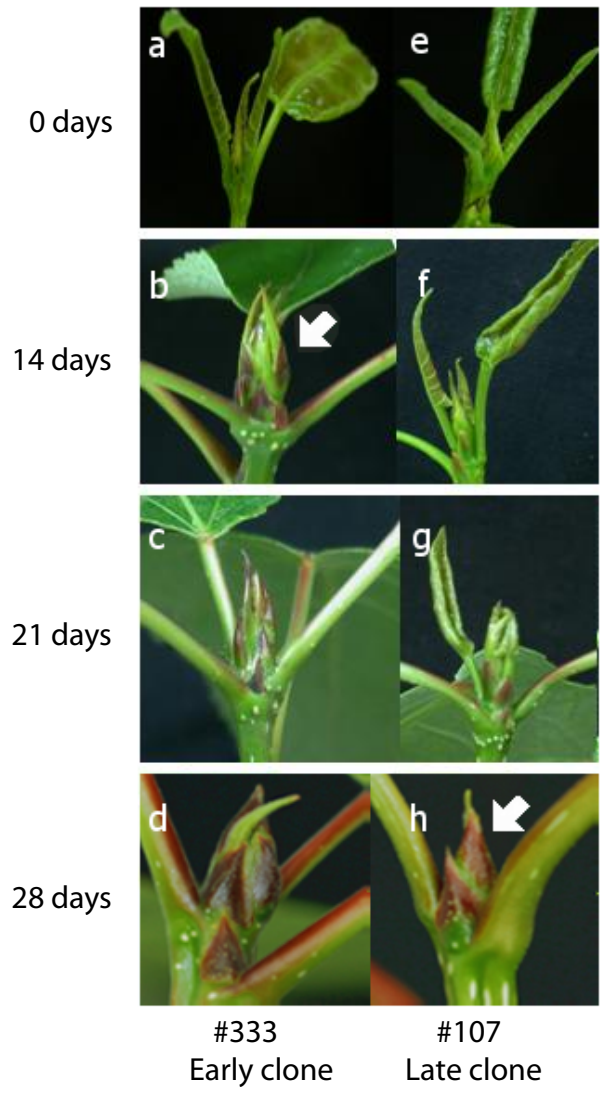

Supplementary Figure 1. (a-d) Characterization of bud set in the early (#333) and the late (#107) hybrid poplar clones (e-h) after short day treatment. Bud formation is indicated by the arrow.
