# Supplementary material
Source: PubMed Central journal article supplement (PMC2971607)

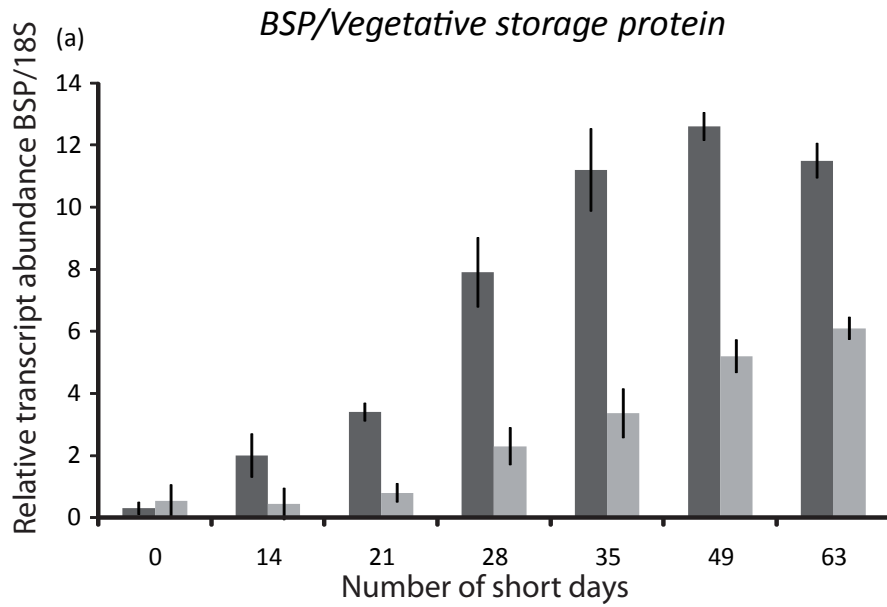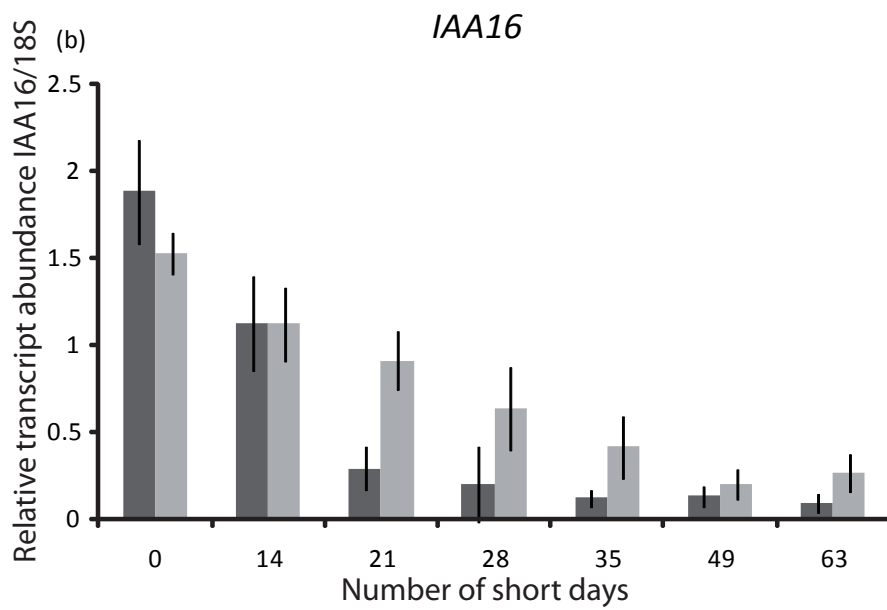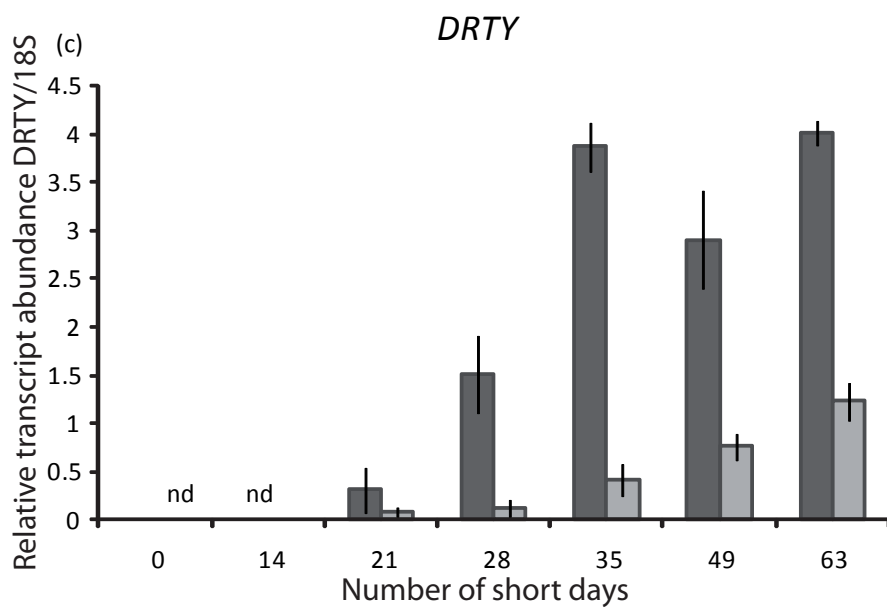

Dark bars= early clone  
Light bars= late clone

Supplement: pp.110.163907_2.pdf [file pp.110.163907_2.pdf]
